# Supplementary material for: Enforced conformational changes in the structural units of glycosaminoglycan (non-sulfated heparin-based oligosaccharides)
Source: Royal Society of Chemistry journal article supplement (doi:10.1039/c4ra05530f), 2014-01-01
Supplement: c4ra05530f3.pdf [file c4ra05530f3.pdf]

## Supplementary Information:

### Enforced conformational changes in the structural units of glycosaminoglycan (non-sulfated heparin-based oligosaccharides)

A. Brzyska, K. Woliński

Tab. 1S Results for IdoA<sup>c</sup>

| Stretched structure |              |       | Relaxed structure |       |        |        |        | conformer |
|---------------------|--------------|-------|-------------------|-------|--------|--------|--------|-----------|
| f                   | E            | L     | E[                | L     | tau1   | tau2   | tau3   |           |
| [au]                | [au]         | [Å]   | [au]              | [Å]   |        | [°]    |        |           |
| 0.0000              | -761.2197815 | 4.589 | -761.2197815      | 4.589 | 51.58  | -58.84 | 54.47  | 1C4       |
| 0.0150              | -761.2155966 | 4.878 | -761.2197819      | 4.589 | 51.81  | -52.87 | 54.51  | 1C4       |
| 0.0200              | -761.2122035 | 4.906 | -761.2197820      | 4.589 | 51.82  | -52.87 | 54.51  | 1C4       |
| 0.0250              | -761.2076174 | 5.088 | -761.2197821      | 4.589 | 51.82  | -52.87 | 54.51  | 1C4       |
| 0.0285              | -761.2031995 | 5.175 | -761.2197813      | 4.589 | 51.81  | -52.82 | 54.45  | 1C4       |
| 0.0300              | -761.1959319 | 5.626 | -761.2158000      | 5.011 | 66.01  | -44.52 | -7.19  | 0S2       |
| 0.0350              | -761.1917532 | 5.636 | -761.2157988      | 5.012 | 66.01  | -44.48 | -7.26  | 0S2       |
| 0.0400              | -761.1875858 | 5.753 | -761.2157974      | 5.011 | 66.01  | -44.52 | -7.29  | 0S2       |
| 0.0450              | -761.1829080 | 5.811 | -761.2157983      | 5.011 | 66.01  | -44.51 | -7.20  | 0S2       |
| 0.0475              | -761.1773748 | 5.836 | -761.2157931      | 5.011 | 66.01  | -44.52 | -7.20  | 0S2       |
| 0.0500              | -761.1744160 | 5.868 | -761.2157929      | 5.011 | 66.01  | -44.52 | -7.20  | 0S2       |
| 0.0550              | -761.1679212 | 5.934 | -761.2157917      | 5.011 | 66.04  | -44.55 | -7.19  | 0S2       |
| 0.0600              | -761.1605011 | 6.020 | -761.2157910      | 5.011 | 66.03  | -44.51 | -7.14  | 0S2       |
| 0.0615              | -761.1576998 | 6.026 | -761.2157922      | 5.495 | 66.02  | -44.52 | -7.22  | 4C1       |
| 0.0650              | -761.1719270 | 6.082 | -761.2105139      | 5.495 | -53.18 | 54.70  | -57.66 | 4C1       |
| 0.0700              | -761.1637925 | 6.146 | -761.2105139      | 5.495 | -53.18 | 54.70  | -57.66 | 4C1       |
| 0.0750              | -761.1538774 | 6.218 | -761.2105139      | 5.494 | -53.18 | 54.72  | -57.65 | 4C1       |

Tab. 2S Results for IdoA<sup>s</sup>

| Stretched structure |             |       | Relaxed structure |       |        |       |        | conformer |
|---------------------|-------------|-------|-------------------|-------|--------|-------|--------|-----------|
| f                   | E           | L     | E[                | L     | tau1   | tau2  | tau3   |           |
| [au]                | [au]        | [Å]   | [au]              | [Å]   |        | [°]   |        |           |
| 0.0000              | -761.210445 | 5.101 | -761.210445       | 5.101 | -61.49 | 34.32 | 28.53  | 2SO       |
| 0.0200              | -761.204007 | 5.486 | -761.210464       | 5.110 | -62.02 | 35.54 | 27.17  | 2SO       |
| 0.0250              | -761.200829 | 5.543 | -761.210465       | 5.110 | -62.04 | 35.48 | 27.24  | 2SO       |
| 0.0300              | -761.197085 | 5.615 | -761.210465       | 5.110 | -62.05 | 35.47 | 27.24  | 2SO       |
| 0.0350              | -761.192763 | 5.685 | -761.210466       | 5.110 | -62.03 | 35.46 | 27.29  | 2SO       |
| 0.0375              | -761.190355 | 5.720 | -761.210466       | 5.110 | -62.02 | 35.47 | 27.26  | 2SO       |
| 0.0400              | -761.210139 | 5.808 | -761.222963       | 5.482 | -55.34 | 56.10 | -57.57 | 4C1       |
| 0.0450              | -761.206281 | 5.856 | -761.222964       | 5.482 | -55.34 | 56.11 | -57.38 | 4C1       |
| 0.0500              | -761.201727 | 5.907 | -761.222963       | 5.482 | -55.34 | 56.11 | -57.59 | 4C1       |
| 0.0550              | -761.196365 | 5.961 | -761.222961       | 5.482 | -55.33 | 56.13 | -57.64 | 4C1       |
| 0.0600              | -761.190041 | 6.019 | -761.222961       | 5.482 | -55.34 | 56.14 | -57.64 | 4C1       |
| 0.0650              | -761.182486 | 6.083 | -761.222964       | 5.482 | -55.33 | 56.09 | -57.55 | 4C1       |
| 0.0700              | -761.173274 | 6.155 | -761.222963       | 5.483 | -55.34 | 56.08 | -57.53 | 4C1       |
| 0.0750              | -761.161414 | 6.241 | -761.222963       | 5.482 | -55.34 | 56.14 | 57.64  | 4C1       |

Tab. 3S Results for GlcN

| Stretched structure |             |       | Relaxed structure |       |        |       |        | conformer |
|---------------------|-------------|-------|-------------------|-------|--------|-------|--------|-----------|
| f                   | E           | L     | E[                | L     | tau1   | tau2  | tau3   |           |
| [au]                | [au]        | [Å]   | [au]              | [Å]   |        | [°]   |        |           |
| 0.0000              | -667.321493 | 4.565 | -667.321493       | 4.565 | -53.08 | 56.37 | -57.56 | 4C1       |
| 0.0050              | -667.320417 | 4.800 | -667.321492       | 4.565 | -52.34 | 59.38 | -61.02 | 4C1       |
| 0.0100              | -667.317414 | 5.013 | -667.321493       | 4.565 | -53.07 | 56.36 | -57.55 | 4C1       |
| 0.0150              | -667.312961 | 5.202 | -667.321493       | 4.565 | -53.07 | 56.37 | -57.55 | 4C1       |
| 0.0200              | -667.307523 | 5.367 | -667.321493       | 4.565 | -53.07 | 56.36 | -57.55 | 4C1       |
| 0.0250              | -667.301479 | 5.510 | -667.321493       | 4.564 | -53.08 | 56.36 | -57.53 | 4C1       |
| 0.0275              | -667.301496 | 5.660 | -667.307180       | 5.477 | -37.39 | 64.68 | -26.11 | 1S3       |
| 0.0300              | -667.300330 | 5.681 | -667.307179       | 5.447 | -37.41 | 64.69 | -26.10 | 1S3       |
| 0.0350              | -667.297590 | 5.726 | -667.307179       | 5.447 | -37.35 | 64.69 | -26.15 | 1S3       |
| 0.0400              | -667.294273 | 5.773 | -667.307179       | 5.447 | -37.35 | 64.68 | -26.14 | 1S3       |
| 0.0450              | -667.290307 | 5.822 | -667.307179       | 5.447 | -37.36 | 64.48 | -26.14 | 1S3       |
| 0.0500              | -667.285602 | 5.874 | -667.307179       | 5.447 | -37.34 | 64.48 | -26.15 | 1S3       |
| 0.0550              | -667.280044 | 5.930 | -667.307178       | 5.447 | -37.35 | 64.48 | -26.14 | 1S3       |
| 0.0600              | -667.273468 | 5.991 | -667.307178       | 5.447 | -37.36 | 64.49 | -26.15 | 1S3       |
| 0.0650              | -667.265636 | 6.057 | -667.307177       | 5.447 | -37.41 | 64.70 | -26.13 | 1S3       |
| 0.0700              | -667.254437 | 6.151 | -667.307177       | 5.447 | -32.14 | 63.89 | -30.29 | 1S3       |
| 0.0750              | -667.304638 | 6.234 | -667.307177       | 5.471 | -32.17 | 63.88 | -30.27 | 1S3       |

Tab. 4S Results for GluA

| Stretched structure |             |       |             | Relaxed structure |        |       |        | conformer |
|---------------------|-------------|-------|-------------|-------------------|--------|-------|--------|-----------|
| f                   | E           | L     | E[          | L                 | tau1   | tau2  | tau3   |           |
| [au]                | [au]        | [Å]   | [au]        | [Å]               |        | [°]   |        |           |
| 0.0000              | -761.215755 | 5.462 | -761.215755 | 5.462             | -52.85 | 47.07 | -50.17 | 4C1       |
| 0.0200              | -761.212663 | 5.624 | -761.215755 | 5.462             | -52.85 | 47.08 | -50.19 | 4C1       |
| 0.0300              | -761.208674 | 5.709 | -761.215755 | 5.462             | -52.64 | 47.07 | -50.18 | 4C1       |
| 0.0400              | -761.202734 | 5.798 | -761.215755 | 5.462             | -52.85 | 47.06 | -50.16 | 4C1       |
| 0.0500              | -761.194415 | 5.896 | -761.215755 | 5.462             | -52.85 | 47.07 | -50.18 | 4C1       |
| 0.0600              | -761.182997 | 6.006 | -761.215755 | 5.462             | -52.85 | 47.08 | -50.19 | 4C1       |
| 0.0700              | -761.167069 | 6.135 | -761.215755 | 5.462             | -52.85 | 47.08 | -50.20 | 4C1       |
| 0.0750              | -761.156433 | 6.213 | -761.215755 | 5.462             | -52.84 | 47.08 | -50.21 | 4C1       |

Tab 5S. Results for IdoA<sup>c</sup>-GlcN

| Stretched structure |              |          |          |          | Relaxed structure |          |             |             |             |           |          |             |             |             |               |           |
|---------------------|--------------|----------|----------|----------|-------------------|----------|-------------|-------------|-------------|-----------|----------|-------------|-------------|-------------|---------------|-----------|
| f                   | E            | IdoAc    | GlcN     | Total    | E[<br>[au]        | IdoAc    |             |             |             | conformer | GlcN     |             |             |             | L(tot)<br>[Å] |           |
| [au]                | [au]         | L<br>[Å] | L<br>[Å] | L<br>[Å] |                   | L<br>[Å] | tau1<br>[°] | tau2<br>[°] | tau3<br>[°] |           | L<br>[Å] | tau1<br>[°] | tau2<br>[°] | tau3<br>[°] |               | conformer |
| 0.0000              | -1352.116617 | 4.656    | 4.559    | 8.956    | -1352.116617      | 4.656    | 51.04       | -53.60      | 54.08       | 1C4       | 4.559    | -53.86      | 57.11       | -58.27      | 4C1           | 8.956     |
| 0.0200              | -1352.094513 | 4.932    | 5.279    | 10.159   | -1352.116622      | 4.656    | 51.04       | -53.60      | 54.09       | 1C4       | 4.559    | -53.85      | 57.09       | -58.23      | 4C1           | 8.956     |
| 0.0250              | -1352.083519 | 5.029    | 5.421    | 10.418   | -1352.116624      | 4.656    | 51.04       | -53.63      | 54.08       | 1C4       | 4.558    | -53.85      | 57.07       | -58.22      | 4C1           | 8.956     |
| 0.0300              | -1352.070958 | 5.139    | 5.543    | 10.661   | -1352.116625      | 4.656    | 51.03       | -53.66      | 54.12       | 1C4       | 4.558    | -53.83      | 57.06       | -58.22      | 4C1           | 8.956     |
| 0.0315              | -1352.063769 | 5.595    | 5.530    | 11.091   | -1352.112366      | 5.054    | 65.14       | -45.28      | -7.35       | 0S2       | 4.513    | -52.13      | 54.67       | -56.92      | 4C1           | 9.317     |
| 0.0325              | -1352.061693 | 5.607    | 5.555    | 11.125   | -1352.112366      | 5.054    | 65.12       | -45.48      | -7.34       | 0S2       | 4.513    | -52.14      | 54.68       | -56.92      | 4C1           | 9.317     |
| 0.0350              | -1352.060196 | 5.636    | 5.691    | 11.290   | -1352.097949      | 5.047    | 65.20       | -45.20      | -7.22       | 0S2       | 5.445    | -38.04      | 64.14       | -25.10      | 1S3           | 9.974     |
| 0.0400              | -1352.052809 | 5.697    | 5.733    | 11.395   | -1352.097948      | 5.047    | 65.28       | -45.20      | -7.22       | 0S2       | 5.445    | -37.98      | 64.14       | -25.14      | 1S3           | 9.973     |
| 0.0425              | -1352.048631 | 5.723    | 5.754    | 11.445   | -1352.097947      | 5.047    | 65.28       | -45.20      | -7.29       | 0S2       | 5.450    | 37.95       | 64.14       | -25.16      | 1S3           | 9.974     |
| 0.0450              | -1352.062079 | 5.824    | 5.771    | 11.559   | -1352.095424      | 5.528    | -57.28      | 53.81       | -54.21      | 4C1       | 5.444    | -41.02      | 61.30       | -19.46      | 1S3           | 10.715    |
| 0.0500              | -1352.053916 | 5.866    | 5.818    | 11.650   | -1352.095423      | 5.528    | -57.24      | 53.78       | -54.19      | 4C1       | 5.444    | -40.97      | 61.31       | -19.51      | 1S3           | 10.714    |
| 0.0550              | -1352.044460 | 5.911    | 5.867    | 11.745   | -1352.095422      | 5.528    | -57.21      | 53.72       | -54.13      | 4C1       | 5.444    | -40.73      | 61.35       | -19.71      | 1S3           | 10.712    |
| 0.0600              | -1352.033488 | 5.958    | 5.919    | 11.846   | -1352.095424      | 5.528    | -57.23      | 53.69       | -54.10      | 4C1       | 5.444    | -40.69      | 61.33       | -19.75      | 1S3           | 10.711    |
| 0.0650              | -1352.020706 | 6.007    | 5.976    | 11.954   | -1352.095425      | 5.528    | -57.23      | 53.70       | -54.11      | 4C1       | 5.444    | -40.69      | 61.36       | -19.76      | 1S3           | 10.712    |
| 0.0700              | -1352.003993 | 6.061    | 6.0585   | 12.092   | -1352.095425      | 5.527    | -57.02      | 53.89       | -54.35      | 4C1       | 5.444    | -32.91      | 60.067      | -25.39      | 1S3           | 10.713    |

Tab. 6S. Results for IdoA<sup>s</sup>-GlcN

| Stretched structure |              |                   |       |        | Relaxed structure |                   |        |       |           |      |       |        |       |           |        |        |
|---------------------|--------------|-------------------|-------|--------|-------------------|-------------------|--------|-------|-----------|------|-------|--------|-------|-----------|--------|--------|
| f                   | E            | IdoA <sup>s</sup> | GlcN  | L(tot) | E[                | IdoA <sup>s</sup> |        |       |           | GlcN |       |        |       |           | L(tot) |        |
| [au]                | [au]         | L                 | L     | [au]   | L                 | tau1              | tau2   | tau3  | conformer | L    | tau1  | tau2   | tau3  | conformer | [Å]    |        |
|                     |              | [Å]               | [Å]   |        | [Å]               |                   | [°]    |       |           | [Å]  |       | [°]    |       |           |        |        |
| 0.0000              | -1352.106222 | 5.105             | 4.592 | 9.321  | -1352.106222      | 5.105             | -62.02 | 44.14 | 16.03     | 2S0  | 4.592 | -55.14 | 58.06 | -59.03    | 4C1    | 9.321  |
| 0.0200              | -1352.083828 | 5.464             | 5.273 | 10.688 | -1352.106251      | 5.112             | -62.04 | 44.31 | 17.10     | 2S0  | 4.602 | -55.16 | 58.34 | -59.28    | 4C1    | 9.314  |
| 0.0250              | -1352.075099 | 5.527             | 5.414 | 10.893 | -1352.106251      | 5.112             | -62.03 | 43.29 | 17.13     | 2S0  | 4.603 | -55.16 | 58.36 | -59.29    | 4C1    | 9.313  |
| 0.0275              | -1352.070153 | 5.556             | 5.483 | 10.993 | -1352.106250      | 5.112             | -62.03 | 43.31 | 17.10     | 2S0  | 4.603 | -55.14 | 58.35 | -59.29    | 4C1    | 9.314  |
| 0.0300              | -1352.066997 | 5.587             | 5.662 | 11.209 | -1352.104656      | 5.084             | -60.72 | 41.95 | 19.32     | 2S0  | 5.021 | -66.04 | 50.15 | 3.76      | 2S0    | 9.656  |
| 0.0325              | -1352.063739 | 5.621             | 5.682 | 11.264 | -1352.104657      | 5.084             | -60.69 | 41.97 | 19.28     | 2S0  | 5.022 | -66.03 | 50.16 | 3.72      | 2S0    | 9.657  |
| 0.0350              | -1352.081331 | 5.721             | 5.687 | 11.352 | -1352.113107      | 5.482             | -55.85 | 55.38 | -56.29    | 4C1  | 5.467 | -41.70 | 63.58 | -21.35    | 1S3    | 10.302 |
| 0.0400              | -1352.074910 | 5.763             | 5.730 | 11.443 | -1352.113111      | 5.482             | -55.83 | 55.38 | -56.28    | 4C1  | 5.465 | -42.69 | 63.30 | -20.61    | 1S3    | 10.314 |
| 0.0450              | -1352.067402 | 5.763             | 5.730 | 11.537 | -1352.113110      | 5.482             | -57.04 | 55.03 | -57.68    | 4C1  | 5.465 | -42.62 | 63.50 | -20.61    | 1S3    | 10.314 |
| 0.0500              | -1352.058665 | 5.823             | 5.852 | 11.632 | -1352.113109      | 5.482             | -55.59 | 55.40 | -56.28    | 4C1  | 5.465 | -42.74 | 63.50 | -20.57    | 1S3    | 10.315 |
| 0.0550              | -1352.048499 | 5.873             | 5.901 | 11.736 | -1352.113109      | 5.482             | -55.83 | 55.39 | -56.29    | 4C1  | 5.466 | -42.29 | 63.53 | -20.90    | 1S3    | 10.310 |
| 0.0600              | -1352.036648 | 5.927             | 5.954 | 11.845 | -1352.113109      | 5.482             | -55.83 | 55.40 | -56.30    | 4C1  | 5.466 | -42.42 | 63.52 | -20.79    | 1S3    | 10.311 |
| 0.0650              | -1352.022672 | 6.012             | 5.985 | 11.964 | -1352.113108      | 5.483             | -55.85 | 55.42 | -56.35    | 4C1  | 5.467 | -42.00 | 63.55 | -21.15    | 1S3    | 10.308 |
| 0.0700              | -1352.003861 | 6.077             | 6.062 | 12.107 | -1352.113110      | 5.482             | -55.82 | 55.38 | -56.29    | 4C1  | 5.465 | -42.51 | 63.55 | -20.83    | 1S3    | 10.312 |

Tab. 7S. Results for GlcN-GluA

| Stretched structure |              |       |       |        | Relaxed structure |       |        |       |        |           |       |        |       |        |        |           |
|---------------------|--------------|-------|-------|--------|-------------------|-------|--------|-------|--------|-----------|-------|--------|-------|--------|--------|-----------|
| f                   | E            | IdoAc | GlcN  | L(tot) | E[                | GlcN  |        |       | GluA   |           |       |        |       |        | L(tot) |           |
|                     |              |       |       |        |                   | L     | tau1   | tau2  | tau3   | conformer | L     | tau1   | tau3  | tau3   |        | conformer |
| [au]                | [au]         |       | [Å]   |        | [au]              | [Å]   | [°]    | [°]   |        | [Å]       | [°]   | [°]    | [°]   |        | [Å]    |           |
| 0.0000              | -1352.115789 | 4.487 | 5.464 | 9.891  | -1352.115789      | 4.485 | -51.90 | 52.00 | -54.43 | 4C1       | 5.464 | -54.32 | 52.33 | -54.7  | 4C1    | 9.891     |
| 0.0200              | -1352.100091 | 5.223 | 5.604 | 10.761 | -1352.115789      | 4.485 | -51.89 | 51.92 | -54.33 | 4C1       | 5.464 | -54.31 | 52.34 | -54.71 | 4C1    | 9.891     |
| 0.0250              | -1352.092321 | 5.366 | 5.640 | 10.944 | -1352.115789      | 4.485 | -51.89 | 51.92 | -54.33 | 4C1       | 5.464 | -54.31 | 52.34 | -54.71 | 4C1    | 9.890     |
| 0.0300              | -1352.083218 | 5.499 | 5.678 | 11.119 | -1352.115789      | 4.485 | -51.91 | 51.90 | -54.29 | 4C1       | 5.464 | -54.33 | 52.38 | -54.75 | 4C1    | 9.891     |
| 0.0325              | -1352.080399 | 5.670 | 5.692 | 11.305 | -1352.099978      | 5.469 | -33.39 | 63.62 | -30.15 | 1S3       | 5.467 | -54.11 | 52.61 | -55.07 | 4C1    | 10.356    |
| 0.0350              | -1352.077648 | 5.711 | 5.690 | 11.348 | -1352.099978      | 5.469 | -33.41 | 63.67 | -30.20 | 1S3       | 5.467 | -54.09 | 52.58 | -55.04 | 4C1    | 10.354    |
| 0.0400              | -1352.071422 | 5.732 | 5.751 | 11.436 | -1352.099978      | 5.469 | -33.38 | 63.66 | -30.22 | 1S3       | 5.467 | -54.09 | 52.59 | -55.05 | 4C1    | 10.353    |
| 0.0450              | -1352.064143 | 5.777 | 5.793 | 11.527 | -1352.099978      | 5.469 | -33.43 | 63.65 | -30.17 | 1S3       | 5.467 | -54.10 | 52.57 | -55.02 | 4C1    | 10.355    |
| 0.0500              | -1352.055663 | 5.823 | 5.837 | 11.612 | -1352.099978      | 5.469 | -33.44 | 63.64 | -30.15 | 1S3       | 5.467 | -54.10 | 52.58 | -55.03 | 4C1    | 10.356    |
| 0.0550              | -1352.045804 | 5.873 | 5.884 | 11.720 | -1352.099979      | 5.469 | -33.35 | 63.64 | -30.21 | 1S3       | 5.467 | -54.12 | 52.60 | -13.75 | 4C1    | 10.353    |
| 0.0600              | -1352.034353 | 5.926 | 5.934 | 11.826 | -1352.099979      | 5.469 | -33.40 | 63.63 | -30.16 | 1S3       | 5.467 | -54.11 | 52.58 | -55.02 | 4C1    | 10.354    |
| 0.0650              | -1352.020961 | 5.983 | 5.988 | 11.939 | -1352.099979      | 5.469 | -33.41 | 63.62 | -30.13 | 1S3       | 5.467 | -54.11 | 52.58 | -55.03 | 4C1    | 10.355    |
| 0.0700              | -1352.005153 | 6.046 | 6.047 | 12.063 | -1352.099980      | 5.469 | -33.39 | 63.61 | -30.12 | 1S3       | 5.667 | -54.12 | 52.59 | -55.02 | 4C1    | 10.355    |
| 0.0750              | -1351.986057 | 6.118 | 6.112 | 12.202 | -1352.099980      | 5.469 | -33.41 | 63.64 | -30.17 | 1S3       | 5.667 | -54.10 | 52.57 | -55.01 | 4C1    | 10.354    |

Tab. 8S(a). Results for GlcN-IdoA<sup>c</sup>-GlcN-GluA-GlcN

| f      | Stretched structure |       |                   |       |       |       |        | Relaxed structure |       |                   |       |       |       |        |
|--------|---------------------|-------|-------------------|-------|-------|-------|--------|-------------------|-------|-------------------|-------|-------|-------|--------|
|        | E                   | GlcN  | IdoA <sup>c</sup> | GlcN  | GluA  | GlcN  | Total  | E                 | GlcN  | IdoA <sup>c</sup> | GlcN  | GluA  | GlcN  | Total  |
|        | [au]                | L     |                   |       |       |       | [au]   | L                 |       |                   |       |       |       |        |
|        | [au]                | [Å]   |                   |       |       |       |        | [au]              | [Å]   |                   |       |       |       |        |
| 0.0000 | -3218.723162        | 4.556 | 4.598             | 4.413 | 5.477 | 4.536 | 20.207 | -3218.723162      | 4.564 | 4.554             | 4.436 | 5.481 | 4.628 | 20.701 |
| 0.0200 | -3218.669227        | 5.272 | 4.867             | 5.205 | 5.582 | 5.526 | 25.941 | -3218.723162      | 4.564 | 4.554             | 4.436 | 5.481 | 4.628 | 22.204 |
| 0.0250 | -3218.636262        | 5.418 | 4.974             | 5.318 | 5.618 | 5.438 | 26.577 | -3218.723146      | 4.564 | 4.554             | 4.434 | 5.481 | 4.628 | 22.198 |
| 0.0275 | -3218.624146        | 5.482 | 5.037             | 5.366 | 5.632 | 5.476 | 26.820 | -3218.723164      | 4.564 | 4.554             | 4.436 | 5.481 | 4.628 | 22.201 |
| 0.0300 | -3218.599553        | 5.507 | 5.406             | 5.376 | 5.646 | 5.675 | 27.434 | -3218.675041      | 4.522 | 5.080             | 4.472 | 5.468 | 5.467 | 23.126 |
| 0.0325 | -3218.589393        | 5.561 | 5.439             | 5.414 | 5.663 | 5.694 | 27.606 | -3218.675046      | 4.521 | 5.080             | 4.473 | 5.467 | 5.467 | 23.134 |
| 0.0340 | -3218.579527        | 5.617 | 5.468             | 5.449 | 5.677 | 5.710 | 27.762 | -3218.675034      | 4.522 | 5.080             | 4.469 | 5.467 | 5.469 | 23.130 |
| 0.0350 | -3218.582201        | 5.698 | 5.469             | 5.458 | 5.681 | 5.714 | 27.862 | -3218.660787      | 5.450 | 5.074             | 4.490 | 5.467 | 5.467 | 24.047 |
| 0.0365 | -3218.578412        | 5.709 | 5.471             | 5.478 | 5.691 | 5.726 | 27.914 | -3218.655775      | 5.454 | 5.043             | 4.475 | 5.468 | 5.470 | 22.542 |
| 0.0375 | -3218.572397        | 5.719 | 5.503             | 5.501 | 5.698 | 5.735 | 28.006 | -3218.677342      | 5.450 | 5.073             | 4.452 | 5.475 | 5.452 | 23.751 |
| 0.0400 | -3218.580629        | 5.729 | 5.736             | 5.549 | 5.721 | 5.752 | 28.312 | -3218.680154      | 5.449 | 5.485             | 4.298 | 5.474 | 5.451 | 20.838 |
| 0.0425 | -3218.571584        | 5.750 | 5.754             | 5.581 | 5.739 | 5.774 | 28.428 | -3218.662906      | 5.449 | 5.485             | 4.351 | 5.470 | 5.462 | 21.827 |
| 0.0450 | -3218.561982        | 5.772 | 5.772             | 5.612 | 5.757 | 5.796 | 28.544 | -3218.662914      | 5.448 | 5.485             | 4.351 | 5.470 | 5.463 | 21.843 |
| 0.0475 | -3218.551705        | 5.795 | 5.791             | 5.643 | 5.775 | 5.819 | 28.661 | -3218.662920      | 5.448 | 5.484             | 4.356 | 5.470 | 5.463 | 21.871 |
| 0.0500 | -3218.540787        | 5.819 | 5.809             | 5.673 | 5.794 | 5.843 | 28.780 | -3218.662920      | 5.448 | 5.485             | 4.353 | 5.470 | 5.464 | 21.846 |
| 0.0525 | -3218.529120        | 5.843 | 5.829             | 5.702 | 5.813 | 5.868 | 28.900 | -3218.662907      | 5.448 | 5.485             | 4.350 | 5.470 | 5.462 | 21.830 |
| 0.0550 | -3218.516638        | 5.867 | 5.848             | 5.732 | 5.832 | 5.893 | 29.023 | -3218.662902      | 5.449 | 5.485             | 4.347 | 5.470 | 5.462 | 21.801 |
| 0.0600 | -3218.488915        | 5.920 | 5.889             | 5.792 | 5.874 | 5.948 | 29.278 | -3218.662972      | 5.448 | 5.485             | 4.347 | 5.471 | 5.469 | 21.815 |
| 0.0625 | -3218.477360        | 5.948 | 5.904             | 5.831 | 5.892 | 5.977 | 29.401 | -3218.680197      | 5.448 | 5.485             | 4.311 | 5.476 | 5.451 | 21.059 |
| 0.0650 | -3218.461115        | 5.977 | 5.927             | 5.857 | 5.914 | 6.008 | 29.535 | -3218.680198      | 5.448 | 5.485             | 4.313 | 5.476 | 5.451 | 21.062 |
| 0.0675 | -3218.437184        | 6.028 | 5.954             | 5.884 | 5.941 | 6.042 | 29.713 | -3218.660277      | 5.478 | 5.486             | 4.341 | 5.470 | 5.464 | 21.739 |
| 0.0700 | -3218.422857        | 6.059 | 5.973             | 5.910 | 5.962 | 6.077 | 29.842 | -3218.660224      | 5.479 | 5.486             | 4.383 | 5.470 | 5.468 | 22.265 |
| 0.0730 | -3218.397421        | 6.099 | 6.044             | 5.945 | 5.993 | 6.125 | 30.030 | -3218.660236      | 5.479 | 5.486             | 4.388 | 5.470 | 5.469 | 22.312 |
| 0.0745 | -3218.383061        | 6.121 | 6.019             | 5.965 | 6.010 | 6.151 | 30.134 | -3218.660214      | 5.479 | 5.486             | 4.377 | 5.470 | 5.467 | 22.193 |

Tab. 8S (b). Results for GlcN-IdoA<sup>c</sup>-GlcN-GluA-GlcN

| Relaxed structure |        |       |        |           |                   |        |        |           |        |       |        |           |        |       |       |           |        |       |        |           |
|-------------------|--------|-------|--------|-----------|-------------------|--------|--------|-----------|--------|-------|--------|-----------|--------|-------|-------|-----------|--------|-------|--------|-----------|
| f                 | GlcN   |       |        |           | IdoA <sup>c</sup> |        |        |           | GlcN   |       |        |           | GluA   |       |       |           | GlcN   |       |        |           |
|                   | tau1   | tau2  | tau3   | conformer | tau1              | tau2   | tau3   | conformer | tau1   | tau2  | tau3   | conformer | tau1   | tau2  | tau3  | conformer | tau1   | tau2  | tau3   | conformer |
| [au]              | [°]    |       |        |           | [°]               |        |        |           | [°]    |       |        |           | [°]    |       |       |           | [°]    |       |        |           |
| 0.0000            | -53.95 | 57.08 | -58.02 | 4C1       | 46.49             | -52.08 | 54.45  | 1C4       | -52.06 | 49.90 | -51.77 | 4C1       | -54.79 | 52.45 | -57.0 | 4C1       | -50.57 | 54.53 | -55.52 | 4C1       |
| 0.0200            | -52.93 | 55.63 | -58.21 | 4C1       | 53.07             | -52.15 | 52.10  | 1C4       | -51.90 | 49.84 | -51.76 | 4C1       | -53.42 | 50.94 | -55.0 | 4C1       | -48.67 | 55.28 | -59.88 | 4C1       |
| 0.0250            | -52.92 | 55.61 | -58.21 | 4C1       | 53.06             | -52.17 | 52.12  | 1C4       | -51.85 | 49.73 | -51.64 | 4C1       | -53.44 | 50.95 | -55.0 | 4C1       | -48.71 | 55.27 | -59.74 | 4C1       |
| 0.0275            | -52.97 | 55.66 | -58.21 | 4C1       | 53.06             | -52.16 | 52.11  | 1C4       | -51.91 | 49.85 | -51.75 | 4C1       | -53.39 | 50.99 | -55.1 | 4C1       | -48.69 | 55.25 | -59.85 | 4C1       |
| 0.0300            | -52.18 | 55.01 | -57.22 | 4C1       | 61.32             | -42.86 | -10.52 | 0S2       | -53.14 | 51.36 | -52.95 | 4C1       | -53.84 | 50.87 | -54.4 | 4C1       | 14.97  | 41.52 | -62.60 | 1S5       |
| 0.0325            | -52.21 | 55.02 | -57.19 | 4C1       | 61.32             | -42.88 | -10.51 | 0S2       | -53.16 | 51.42 | -53.00 | 4C1       | -53.83 | 50.86 | -54.4 | 4C1       | 15.05  | 41.46 | -62.63 | 1S5       |
| 0.0340            | -52.17 | 55.02 | -57.23 | 4C1       | 61.30             | -42.90 | -10.48 | 0S2       | -53.23 | 51.33 | -52.81 | 4C1       | -53.81 | 50.77 | -54.3 | 4C1       | 16.21  | 40.67 | -63.40 | 1S5       |
| 0.0350            | -37.58 | 64.34 | -25.71 | 4C1       | 61.53             | -42.65 | -10.49 | 0S2       | -53.18 | 51.84 | -53.52 | 4C1       | -53.79 | 50.77 | -54.3 | 4C1       | 15.28  | 41.31 | -62.82 | 1S5       |
| 0.0365            | -39.44 | 63.89 | -24.13 | 1S3       | 63.02             | -39.57 | -12.32 | 0S2       | -53.02 | 51.31 | -52.96 | 4C1       | -53.88 | 50.75 | -54.2 | 4C1       | 16.13  | 40.65 | -63.48 | 1S5       |
| 0.0375            | -37.73 | 64.36 | -25.64 | 1S3       | 61.56             | -42.59 | -10.43 | 0S2       | -52.47 | 49.92 | -51.56 | 4C1       | -53.23 | 48.23 | -51.3 | 4C1       | -12.13 | 55.54 | -40.03 | 1S3       |
| 0.0400            | -39.02 | 61.57 | -21.68 | 1S3       | -52.48            | 50.94  | -52.07 | 4C1       | -53.57 | 47.45 | -44.75 | 4C1       | -54.05 | 49.16 | -51.9 | 4C1       | -11.85 | 55.53 | -40.34 | 1S3       |
| 0.0425            | -38.76 | 61.47 | -21.74 | 1S3       | -52.33            | 51.29  | -52.53 | 4C1       | -53.20 | 48.40 | -46.31 | 4C1       | -55.10 | 51.26 | -54.2 | 4C1       | 11.41  | 43.89 | -60.04 | 1S3       |
| 0.0450            | -39.05 | 61.54 | -21.64 | 1S3       | -52.36            | 51.33  | -52.54 | 4C1       | -53.20 | 48.41 | -46.33 | 4C1       | -55.12 | 51.27 | -54.2 | 4C1       | 12.21  | 43.39 | -69.70 | 1S3       |
| 0.0475            | -38.84 | 61.52 | -21.76 | 1S3       | -52.35            | 51.32  | -52.54 | 4C1       | -53.18 | 48.57 | -46.60 | 4C1       | -55.14 | 51.28 | -54.2 | 4C1       | 12.49  | 43.22 | -69.90 | 1S3       |
| 0.0500            | -39.11 | 61.55 | -21.61 | 1S3       | -52.38            | 51.33  | -52.51 | 4C1       | -53.24 | 48.51 | -46.46 | 4C1       | -55.14 | 51.30 | -54.2 | 4C1       | 12.69  | 43.07 | -61.04 | 1S3       |
| 0.0525            | -39.06 | 61.55 | -21.64 | 1S3       | -52.34            | 51.31  | -52.52 | 4C1       | -53.21 | 48.39 | -46.29 | 4C1       | -55.11 | 51.27 | -54.2 | 4C1       | 11.79  | 43.66 | -60.35 | 1S3       |
| 0.0550            | -38.81 | 61.49 | -21.74 | 1S3       | -52.37            | 51.31  | -52.51 | 4C1       | -53.22 | 48.35 | -46.24 | 4C1       | -55.11 | 51.29 | -54.2 | 4C1       | 11.77  | 43.64 | -60.28 | 1S3       |
| 0.0600            | -39.22 | 61.56 | -21.55 | 1S3       | -52.45            | 51.31  | -52.47 | 4C1       | -53.20 | 48.34 | -46.28 | 4C1       | -55.08 | 51.34 | -54.4 | 4C1       | 15.90  | 40.83 | -63.56 | 1S3       |
| 0.0625            | -39.04 | 61.50 | -21.56 | 1S3       | -52.46            | 51.18  | -52.30 | 4C1       | -53.44 | 47.65 | -45.16 | 4C1       | -53.87 | 49.18 | -52.2 | 4C1       | -11.53 | 55.37 | -40.44 | 1S3       |
| 0.0650            | -39.10 | 61.50 | -21.53 | 1S3       | -52.49            | 51.18  | -52.28 | 4C1       | -53.44 | 47.68 | -45.20 | 4C1       | -53.86 | 49.19 | -52.2 | 4C1       | -11.54 | 55.36 | -40.40 | 1S3       |
| 0.0675            | -31.26 | 60.24 | -26.61 | 1S3       | -52.43            | 51.25  | -52.37 | 4C1       | -53.26 | 48.20 | -45.96 | 4C1       | -55.13 | 51.31 | -54.2 | 4C1       | 12.94  | 42.88 | -61.28 | 1S5       |
| 0.0700            | -31.36 | 60.24 | -26.54 | 1S3       | -52.22            | 51.37  | -52.71 | 4C1       | -53.08 | 49.16 | -47.51 | 4C1       | -54.96 | 50.91 | -54.0 | 4C1       | 15.50  | 41.15 | -63.25 | 1S5       |
| 0.0730            | -31.34 | 60.22 | -26.52 | 1S3       | -52.23            | 51.38  | -52.72 | 4C1       | -52.06 | 49.28 | -47.70 | 4C1       | -54.96 | 50.84 | -53.9 | 4C1       | 16.03  | 40.75 | -63.62 | 1S5       |
| 0.0745            | -31.54 | 60.29 | -26.46 | 1S3       | -52.29            | 51.41  | -52.68 | 4C1       | -53.14 | 49.03 | -47.29 | 4C1       | -54.96 | 50.99 | -54.1 | 4C1       | 14.84  | 41.61 | -62.73 | 1S5       |

Tab 9s (a) Results for GlcN-IdoA<sup>s</sup>-GlcN-GluA-GlcN

| f      | Stretched structure |       |                   |       |       |       |        | Relaxed structure |       |                   |       |       |       |        |
|--------|---------------------|-------|-------------------|-------|-------|-------|--------|-------------------|-------|-------------------|-------|-------|-------|--------|
|        | E                   | GlcN  | IdoA <sup>s</sup> | GlcN  | GluA  | GlcN  | Total  | E                 | GlcN  | IdoA <sup>s</sup> | GlcN  | GluA  | GlcN  | Total  |
|        |                     |       |                   |       |       |       |        |                   |       |                   |       |       |       |        |
| [au]   | [au]                | [Å]   |                   |       |       | [au]  | [Å]    |                   |       |                   |       |       |       |        |
| 0.0000 | -3218.700529        | 4.555 | 5.172             | 4.459 | 5.475 | 4.532 | 22.809 | -3218.700529      | 4.555 | 5.172             | 4.459 | 5.475 | 4.532 | 22.809 |
| 0.0100 | -3218.684507        | 4.921 | 5.281             | 4.642 | 5.529 | 5.066 | 24.931 | -3218.700529      | 4.558 | 5.173             | 4.478 | 5.477 | 4.626 | 22.745 |
| 0.0150 | -3218.669762        | 5.098 | 5.351             | 4.767 | 5.553 | 5.181 | 25.562 | -3218.700529      | 4.557 | 5.172             | 4.479 | 5.477 | 4.625 | 22.736 |
| 0.0200 | -3218.648729        | 5.263 | 5.438             | 4.933 | 5.580 | 5.280 | 26.201 | -3218.700535      | 4.557 | 5.172             | 4.480 | 5.478 | 4.625 | 22.730 |
| 0.0225 | -3218.629983        | 5.344 | 5.505             | 5.310 | 5.602 | 5.397 | 26.963 | -3218.702302      | 4.579 | 5.131             | 4.627 | 5.480 | 4.626 | 22.392 |
| 0.0230 | -3218.628209        | 5.358 | 5.510             | 5.319 | 5.605 | 5.406 | 27.005 | -3218.702299      | 4.579 | 5.131             | 4.626 | 5.480 | 4.625 | 22.390 |
| 0.0250 | -3218.620919        | 5.413 | 5.531             | 5.354 | 5.616 | 5.439 | 27.165 | -3218.702298      | 4.579 | 5.131             | 4.627 | 5.480 | 4.625 | 22.391 |
| 0.0275 | -3218.611407        | 5.484 | 5.556             | 5.395 | 5.631 | 5.477 | 27.357 | -3218.702297      | 4.579 | 5.131             | 4.631 | 5.480 | 4.625 | 22.394 |
| 0.0285 | -3218.607252        | 5.515 | 5.565             | 5.411 | 5.637 | 5.492 | 27.436 | -3218.702294      | 4.579 | 5.131             | 4.632 | 5.480 | 4.624 | 22.391 |
| 0.0300 | -3218.595222        | 5.663 | 5.579             | 5.439 | 5.645 | 6.170 | 27.810 | -3218.676584      | 4.946 | 5.111             | 4.637 | 5.471 | 5.451 | 23.490 |
| 0.0325 | -3218.587248        | 5.682 | 5.598             | 5.496 | 5.662 | 5.995 | 27.947 | -3218.693200      | 5.423 | 5.138             | 4.593 | 5.472 | 5.451 | 23.629 |
| 0.0350 | -3218.579402        | 5.703 | 5.621             | 5.533 | 5.679 | 5.715 | 28.070 | -3218.693222      | 5.421 | 5.140             | 4.592 | 5.472 | 5.451 | 23.613 |
| 0.0400 | -3218.582495        | 5.733 | 5.741             | 5.628 | 5.716 | 5.754 | 28.364 | -3218.668861      | 5.469 | 5.473             | 3.924 | 5.463 | 5.470 | 18.685 |
| 0.0425 | -3218.574003        | 5.755 | 5.759             | 5.650 | 5.734 | 5.776 | 28.473 | -3218.668868      | 5.469 | 5.473             | 3.916 | 5.463 | 5.470 | 18.682 |
| 0.0450 | -3218.564855        | 5.778 | 5.778             | 5.672 | 5.752 | 5.798 | 28.584 | -3218.668916      | 5.469 | 5.473             | 3.908 | 5.463 | 5.468 | 18.706 |
| 0.0460 | -3218.561014        | 5.787 | 5.785             | 5.681 | 5.759 | 5.807 | 28.629 | -3218.660871      | 5.472 | 5.484             | 5.463 | 5.464 | 5.469 | 24.000 |
| 0.0485 | -3218.550872        | 5.811 | 5.804             | 5.704 | 5.778 | 5.831 | 28.743 | -3218.660872      | 5.472 | 5.485             | 5.463 | 5.464 | 5.469 | 23.972 |
| 0.0500 | -3218.544398        | 5.825 | 5.816             | 5.718 | 5.789 | 5.845 | 28.813 | -3218.660856      | 5.472 | 5.485             | 5.462 | 5.463 | 5.470 | 23.923 |
| 0.0525 | -3218.532997        | 5.850 | 5.836             | 5.741 | 5.808 | 5.870 | 28.931 | -3218.660885      | 5.472 | 5.485             | 5.463 | 5.464 | 5.470 | 23.959 |
| 0.0600 | -3218.493109        | 5.929 | 5.899             | 5.817 | 5.870 | 5.951 | 29.306 | -3218.660895      | 5.472 | 5.485             | 5.463 | 5.463 | 5.470 | 23.968 |
| 0.0625 | -3218.477559        | 5.957 | 5.922             | 5.845 | 5.892 | 5.981 | 29.441 | -3218.660943      | 5.472 | 5.484             | 5.463 | 5.464 | 5.471 | 24.033 |
| 0.0635 | -3218.470992        | 5.969 | 5.931             | 5.856 | 5.900 | 5.993 | 29.496 | -3218.660957      | 5.472 | 5.484             | 5.463 | 5.464 | 5.470 | 24.055 |
| 0.0650 | -3218.460737        | 5.987 | 5.945             | 5.873 | 5.914 | 6.012 | 29.580 | -3218.660953      | 5.472 | 5.484             | 5.463 | 5.464 | 5.470 | 24.055 |

Tab 9S (b) Results for GlcN-IdoA<sup>s</sup>-GlcN-GluA-GlcN

| <i>f</i> | Relaxed structure |       |        |           |                   |       |        |           |        |       |        |           |        |       |        |           |        |       |        |           |
|----------|-------------------|-------|--------|-----------|-------------------|-------|--------|-----------|--------|-------|--------|-----------|--------|-------|--------|-----------|--------|-------|--------|-----------|
|          | GlcN              |       |        |           | IdoA <sup>s</sup> |       |        |           | GlcN   |       |        |           | GluA   |       |        |           | GlcN   |       |        |           |
|          | tau1              | tau2  | tau3   | conformer | tau1              | tau2  | tau3   | conformer | tau1   | tau2  | tau3   | conformer | tau1   | tau2  | tau3   | conformer | tau1   | tau2  | tau3   | conformer |
| [au]     | [°]               |       |        |           | [°]               |       |        |           | [°]    |       |        |           | [°]    |       |        |           | [°]    |       |        |           |
| 0.0000   | -54.33            | 56.36 | -57.57 | 4C1       | -62.81            | 36.36 | 26.38  | 2S0       | -51.62 | 51.97 | -55.43 | 4C1       | -54.83 | 51.10 | -55.64 | 4C1       | -50.65 | 54.51 | -55.50 | 4C1       |
| 0.0100   | -54.36            | 56.41 | -57.60 | 4C1       | -62.85            | 36.22 | 26.63  | 2S0       | -51.68 | 52.45 | -55.99 | 4C1       | -53.79 | 50.27 | -54.39 | 4C1       | -48.59 | 55.26 | -60.05 | 4C1       |
| 0.0150   | -54.42            | 56.45 | -57.60 | 4C1       | -62.81            | 36.16 | 26.71  | 2S0       | -51.68 | 52.49 | -56.05 | 4C1       | -53.80 | 50.30 | -54.42 | 4C1       | -48.63 | 55.27 | -60.02 | 4C1       |
| 0.0200   | -54.41            | 56.43 | -57.59 | 4C1       | -62.81            | 36.14 | 26.74  | 2S0       | -51.65 | 52.51 | -56.10 | 4C1       | -53.79 | 50.31 | -54.45 | 4C1       | -48.62 | 55.26 | -60.02 | 4C1       |
| 0.0225   | -54.53            | 57.28 | -58.46 | 4C1       | -62.07            | 37.09 | 24.77  | 2S0       | -52.77 | 54.92 | -55.81 | 4C1       | -53.46 | 50.49 | -54.82 | 4C1       | -48.57 | 55.17 | -59.96 | 4C1       |
| 0.0230   | -54.52            | 57.28 | -58.47 | 4C1       | -62.06            | 37.07 | 24.78  | 2S0       | -52.77 | 54.90 | -55.79 | 4C1       | -53.46 | 50.49 | -54.83 | 4C1       | -48.57 | 55.17 | -59.95 | 4C1       |
| 0.0250   | -54.52            | 57.28 | -58.47 | 4C1       | -62.08            | 37.03 | 24.84  | 2S0       | -52.79 | 54.95 | -55.84 | 4C1       | -53.47 | 50.49 | -54.82 | 4C1       | -48.60 | 55.18 | -59.93 | 4C1       |
| 0.0275   | -54.51            | 57.28 | -58.49 | 4C1       | -62.10            | 37.07 | 24.80  | 2S0       | -52.77 | 55.02 | -55.93 | 4C1       | -53.48 | 50.47 | -54.79 | 4C1       | -48.65 | 55.20 | -59.91 | 4C1       |
| 0.0285   | -54.49            | 57.27 | -58.49 | 4C1       | -62.10            | 37.06 | 24.81  | 2S0       | -52.75 | 55.02 | -55.94 | 4C1       | -53.48 | 50.50 | -54.83 | 4C1       | -48.68 | 55.20 | -59.88 | 4C1       |
| 0.0300   | -66.71            | 49.70 | 4.54   | 2S0       | -61.13            | 36.63 | 25.62  | 2S0       | -52.98 | 55.15 | -55.68 | 4C1       | -53.40 | 47.95 | -51.12 | 4C1       | -12.66 | 55.86 | -39.88 | 1S3       |
| 0.0325   | -49.67            | 63.82 | -17.66 | 1S3       | -61.25            | 15.24 | 43.54  | 2,5B      | -52.40 | 53.81 | -54.05 | 4C1       | -53.26 | 48.11 | -51.22 | 4C1       | -12.14 | 55.56 | -40.00 | 1S3       |
| 0.0350   | -49.97            | 63.80 | -17.49 | 1S3       | -61.38            | 15.40 | 43.33  | 2,5B      | -52.44 | 53.75 | -54.05 | 4C1       | -53.32 | 48.12 | -51.27 | 4C1       | -11.86 | 55.43 | -40.18 | 1S3       |
| 0.0400   | -41.47            | 63.81 | -22.08 | 1S3       | -55.83            | 50.29 | -49.56 | 4C1       | -55.33 | 15.11 | 33.62  | 2,5B      | -53.00 | 51.11 | -54.28 | 4C1       | 16.66  | 40.24 | -64.00 | 1S5       |
| 0.0425   | -41.41            | 63.88 | -22.23 | 1S3       | -55.79            | 50.23 | -49.50 | 4C1       | -55.20 | 14.87 | 33.75  | 2,5B      | -52.98 | 51.10 | -54.30 | 4C1       | 16.92  | 40.05 | -64.10 | 1S5       |
| 0.0450   | -41.27            | 63.94 | -22.43 | 1S3       | -55.80            | 50.27 | -49.52 | 4C1       | -55.21 | 14.75 | 33.82  | 2,5B      | -53.04 | 51.28 | -54.43 | 4C1       | 15.77  | 40.92 | -63.35 | 1S5       |
| 0.0460   | -40.23            | 64.16 | -23.43 | 1S3       | -56.39            | 51.01 | -49.89 | 4C1       | -37.57 | 67.49 | -33.55 | 1S3       | -53.81 | 49.89 | -53.07 | 4C1       | 15.25  | 41.23 | -63.01 | 1S5       |
| 0.0485   | -40.26            | 64.17 | -23.44 | 1S3       | -56.38            | 51.03 | -49.92 | 4C1       | -37.41 | 67.50 | -33.68 | 1S3       | -53.80 | 49.80 | -52.97 | 4C1       | 15.94  | 40.75 | -63.52 | 1S5       |
| 0.0500   | -40.25            | 64.17 | -23.45 | 1S3       | -56.39            | 51.25 | -50.22 | 4C1       | -37.41 | 67.53 | -33.75 | 1S3       | -53.79 | 49.72 | -52.88 | 4C1       | 16.57  | 40.28 | -64.01 | 1S5       |
| 0.0525   | -40.19            | 64.16 | -23.48 | 1S3       | -56.39            | 51.09 | -50.00 | 4C1       | -37.44 | 67.51 | -33.67 | 1S3       | -53.80 | 49.80 | -52.97 | 4C1       | 16.22  | 40.54 | -63.73 | 1S5       |
| 0.0600   | -40.14            | 64.15 | -23.50 | 1S3       | -56.39            | 51.02 | -49.92 | 4C1       | -37.37 | 67.47 | -33.65 | 1S3       | -53.82 | 49.80 | -52.91 | 4C1       | 16.35  | 40.43 | -63.82 | 1S5       |
| 0.0625   | -40.34            | 64.14 | -23.35 | 1S3       | -56.37            | 50.80 | -49.63 | 4C1       | -37.73 | 67.42 | -33.28 | 1S3       | -53.83 | 49.85 | -53.02 | 4C1       | 16.48  | 40.33 | -63.90 | 1S5       |
| 0.0635   | -40.35            | 64.14 | -23.34 | 1S3       | -56.38            | 50.76 | -49.57 | 4C1       | -37.85 | 67.40 | -33.17 | 1S3       | -53.84 | 49.91 | -53.08 | 4C1       | 16.26  | 40.50 | -63.72 | 1S5       |
| 0.0650   | -40.34            | 64.14 | -23.34 | 1S3       | -56.36            | 50.80 | -49.65 | 4C1       | -38.00 | 67.39 | -33.08 | 1S3       | -52.83 | 49.90 | -53.09 | 4C1       | 16.29  | 40.47 | -63.70 | 1S5       |
